# Supplementary material
Source: ML conference proceedings conference paper supplement (https://proceedings.neurips.cc/paper_files/paper/2018/hash/b096577e264d1ebd6b41041f392eec23-Abstract.html)
Supplement: Supplementary file [file b096577e264d1ebd6b41041f392eec23-Supplemental.zip]

# Supplementary Material: Reparameterization Gradient for Non-differentiable Models

## A Proof of Theorem 1

Using reparameterization, we can write  $\text{ELBO}_\theta$  as follows:

$$\begin{aligned}\text{ELBO}_\theta &= \mathbb{E}_{q(\epsilon)} \left[ \log \frac{\sum_{k=1}^K \mathbb{1}[f_\theta(\epsilon) \in R_k] \cdot r_k(f_\theta(\epsilon))}{q_\theta(f_\theta(\epsilon))} \right] \\ &= \mathbb{E}_{q(\epsilon)} \left[ \sum_{k=1}^K \mathbb{1}[f_\theta(\epsilon) \in R_k] \cdot \log \frac{r_k(f_\theta(\epsilon))}{q_\theta(f_\theta(\epsilon))} \right] \\ &= \sum_{k=1}^K \mathbb{E}_{q(\epsilon)} \left[ \mathbb{1}[f_\theta(\epsilon) \in R_k] \cdot h_k(\epsilon, \theta) \right].\end{aligned}\tag{6}$$

In (6), we can move the summation and the indicator function out of log since the regions  $\{R_k\}_{1 \leq k \leq K}$  are disjoint. We then compute the gradient of  $\text{ELBO}_\theta$  as follows:

$$\begin{aligned}\nabla_\theta \text{ELBO}_\theta &= \sum_{k=1}^K \nabla_\theta \mathbb{E}_{q(\epsilon)} \left[ \mathbb{1}[f_\theta(\epsilon) \in R_k] \cdot h_k(\epsilon, \theta) \right] \\ &= \sum_{k=1}^K \nabla_\theta \int_{f_\theta^{-1}(R_k)} q(\epsilon) h_k(\epsilon, \theta) d\epsilon \\ &= \sum_{k=1}^K \int_{f_\theta^{-1}(R_k)} \left( q(\epsilon) \nabla_\theta h_k(\epsilon, \theta) + \nabla_\epsilon \bullet (q(\epsilon) h_k(\epsilon, \theta) \mathbf{V}(\epsilon, \theta)) \right) d\epsilon \\ &= \mathbb{E}_{q(\epsilon)} \left[ \sum_{k=1}^K \mathbb{1}[f_\theta(\epsilon) \in R_k] \cdot \nabla_\theta h_k(\epsilon, \theta) \right] + \sum_{k=1}^K \int_{f_\theta^{-1}(R_k)} \nabla_\epsilon \bullet (q(\epsilon) h_k(\epsilon, \theta) \mathbf{V}(\epsilon, \theta)) d\epsilon \\ &= \underbrace{\mathbb{E}_{q(\epsilon)} \left[ \sum_{k=1}^K \mathbb{1}[f_\theta(\epsilon) \in R_k] \cdot \nabla_\theta h_k(\epsilon, \theta) \right]}_{\text{RepGrad}_\theta} + \underbrace{\sum_{k=1}^K \int_{f_\theta^{-1}(\partial R_k)} (q(\epsilon) h_k(\epsilon, \theta) \mathbf{V}(\epsilon, \theta)) \bullet d\boldsymbol{\Sigma}}_{\text{BouContr}_\theta}\end{aligned}\tag{7}$$

where  $\nabla_\epsilon \bullet \mathbf{U}$  denotes the column vector whose  $i$ -th component is  $\nabla_\epsilon \cdot \mathbf{U}_i$ , the divergence of  $\mathbf{U}_i$  with respect to  $\epsilon$ . (8) is the formula that we wanted to prove.

The two non-trivial steps in the above derivation are (7) and (8). First, (7) is a direct consequence of the following theorem, existing yet less well-known, on exchanging integration and differentiation under moving domain:

**Theorem 6.** Let  $D_\theta \subset \mathbb{R}^n$  be a smoothly parameterized region. That is, there exist open sets  $\Omega \subset \mathbb{R}^n$  and  $\Theta \subset \mathbb{R}$ , and twice continuously differentiable  $\hat{\epsilon} : \Omega \times \Theta \rightarrow \mathbb{R}^n$  such that  $D_\theta = \hat{\epsilon}(\Omega, \theta)$  for each  $\theta \in \Theta$ . Suppose that  $\hat{\epsilon}(\cdot, \theta)$  is a  $C^1$ -diffeomorphism for each  $\theta \in \Theta$ . Let  $f : \mathbb{R}^n \times \mathbb{R} \rightarrow \mathbb{R}$  be a differentiable function such that  $f(\cdot, \theta) \in \mathcal{L}^1(D_\theta)$  for each  $\theta \in \Theta$ . If there exists  $g : \Omega \rightarrow \mathbb{R}$  such that  $g \in \mathcal{L}^1(\Omega)$  and  $|\nabla_\theta (f(\hat{\epsilon}(\omega, \theta)) \frac{\partial \hat{\epsilon}}{\partial \omega})| \leq g(\omega)$  for any  $\theta \in \Theta$  and  $\omega \in \Omega$ , then

$$\nabla_\theta \int_{D_\theta} f(\epsilon, \theta) d\epsilon = \int_{D_\theta} \left( \nabla_\theta f + \nabla_\epsilon \cdot (f \mathbf{v}) \right) (\epsilon, \theta) d\epsilon.$$

Here  $\mathbf{v}(\epsilon, \theta)$  denotes  $\nabla_\theta \hat{\epsilon}(\omega, \theta)|_{\omega=\hat{\epsilon}_\theta^{-1}(\epsilon)}$ , the velocity of the particle  $\epsilon$  at time  $\theta$ .

The statement of Theorem 6 (without detailed conditions as we present above) and the sketch of its proof can be found in [3]. One subtlety in applying Theorem 6 to our case is that  $R_k$  (which corresponds to  $\Omega$  in the theorem) may not be open, so the theorem may not be immediately applicable. However, since the boundary  $\partial R_k$  has Lebesgue measure zero in  $\mathbb{R}^n$ , ignoring the reparameterized boundary  $f_\theta^{-1}(\partial R_k)$  in the integral of (7) does not change the value of the integral. Hence, we apply Theorem 6 to  $D_\theta = \text{int}(f_\theta^{-1}(R_k))$  (which is possible because  $\Omega = \text{int}(R_k)$  is now open), and this gives us the desired result. Here  $\text{int}(T)$  denotes the interior of  $T$ .

Second, to prove (8), it suffices to show that

$$\int_V \nabla_\epsilon \bullet U(\epsilon) d\epsilon = \int_{\partial V} U(\epsilon) \bullet d\Sigma$$

where  $U(\epsilon) = q(\epsilon)h_k(\epsilon, \theta)V(\epsilon, \theta)$  and  $V = f_\theta^{-1}(R_k)$ . To prove this equality, we apply the divergence theorem:

**Theorem 7** (Divergence theorem). *Let  $V$  be a compact subset of  $\mathbb{R}^n$  that has a piecewise smooth boundary  $\partial V$ . If  $F$  is a differentiable vector field defined on a neighborhood of  $V$ , then*

$$\int_V (\nabla \cdot F) dV = \int_{\partial V} F \cdot d\Sigma$$

where  $d\Sigma$  is the outward pointing normal vector of the boundary  $\partial V$ .

In our case, the region  $V = f_\theta^{-1}(R_k)$  may not be compact, so we cannot directly apply Theorem 7 to  $U$ . To circumvent the non-compactness issue, we assume that  $q(\epsilon)$  is in  $\mathcal{S}(\mathbb{R}^n)$ , the Schwartz space on  $\mathbb{R}^n$ . That is, assume that every partial derivative of  $q(\epsilon)$  of any order decays faster than any polynomial. This assumption is reasonable in that the probability density of many important probability distributions (e.g., the normal distribution) is in  $\mathcal{S}(\mathbb{R}^n)$ . Since  $q \in \mathcal{S}(\mathbb{R}^n)$ , there exists a sequence of test functions  $\{\phi_j\}_{j \in \mathbb{N}}$  such that each  $\phi_j$  has compact support and  $\{\phi_j\}_{j \in \mathbb{N}}$  converges to  $q$  in  $\mathcal{S}(\mathbb{R}^n)$ , which is a well-known result in functional analysis. Since each  $\phi_j$  has compact support, so does  $U^j(\epsilon) \triangleq \phi_j(\epsilon)h_k(\epsilon, \theta)V(\epsilon, \theta)$ . By applying Theorem 7 to  $U^j$ , we have

$$\int_V \nabla_\epsilon \bullet U^j(\epsilon) d\epsilon = \int_{\partial V} U^j(\epsilon) \bullet d\Sigma.$$

Because  $\{\phi_j\}_{j \in \mathbb{N}}$  converges to  $q$  in  $\mathcal{S}(\mathbb{R}^n)$ , taking the limit  $j \rightarrow \infty$  on the both sides of the equation gives us the desired result.

## B Proof of Theorem 3

Theorem 3 is a direct consequence of the following theorem called “area formula”:

**Theorem 8** (Area formula). *Suppose that  $g : \mathbb{R}^{n-1} \rightarrow \mathbb{R}^n$  is injective and Lipschitz. If  $A \subset \mathbb{R}^{n-1}$  is measurable and  $H : \mathbb{R}^n \rightarrow \mathbb{R}^n$  is measurable, then*

$$\int_{g(A)} H(\epsilon) \cdot d\Sigma = \int_A \left( H(g(\zeta)) \cdot \mathbf{n}(\zeta) \right) |Jg(\zeta)| d\zeta$$

where  $Jg(\zeta) = \det \left[ \frac{\partial g(\zeta)}{\partial \zeta_1} \mid \frac{\partial g(\zeta)}{\partial \zeta_2} \mid \cdots \mid \frac{\partial g(\zeta)}{\partial \zeta_{n-1}} \right] \mathbf{n}(\zeta)$ , and  $\mathbf{n}(\zeta)$  is the unit normal vector of the hypersurface  $g(A)$  at  $g(\zeta)$  such that it has the same direction as  $d\Sigma$ .

A more general version of Theorem 8 can be found in [2]. In our case, the hypersurface  $g(A)$  for the surface integral on the LHS is given by  $\{\epsilon \mid \mathbf{a} \cdot \epsilon = c\}$ , so we use  $A = \mathbb{R}^{n-1}$  and  $g(\zeta) = (\zeta_1, \dots, \zeta_{j-1}, \frac{1}{a_j}(c - \mathbf{a}_{-j} \cdot \zeta), \zeta_j, \dots, \zeta_{n-1})^\top$  and apply Theorem 8 with  $H(\epsilon) = q(\epsilon)F(\epsilon)$ . In this settings,  $\mathbf{n}(\zeta)$  and  $|Jg(\zeta)|$  are calculated as

$$\mathbf{n}(\zeta) = \text{sgn}(-a_j) \frac{|\mathbf{a}_j|}{\|\mathbf{a}\|_2} \left( \frac{a_1}{a_j}, \dots, \frac{a_{j-1}}{a_j}, 1, \frac{a_{j+1}}{a_j}, \dots, \frac{a_n}{a_j} \right)^\top \quad \text{and} \quad |Jg(\zeta)| = \frac{\|\mathbf{a}\|_2}{|a_j|},$$

and this gives us the desired result.
